# Supplementary material
Source: PubMed Central journal article supplement (PMC6584896)
Supplement: jamacardiol-4-765-s001.pdf [file jamacardiol-4-765-s001.pdf]

## Supplementary Online Content

Barbarawi M, Kheiri B, Zayed Y, et al. Vitamin D supplementation and cardiovascular disease risks in more than 83 000 individuals in 21 randomized clinical trials: a meta-analysis. Published online June 19, 2019. *JAMA Cardiol*. doi:10.1001/jamacardio.2019.1870

**eTable.** Major adverse cardiovascular event definition per each study.

**eFigure 1.** Risk of bias summary: review authors' judgments about each risk of bias item for each included study.

**eFigure 2.** Funnel plot of primary endpoints (Major adverse cardiovascular events).

**eFigure 3.** Forest plot of the sensitivity analysis for elderly patients.

**eFigure 4.** Forest plot of the sensitivity analysis for female and male patients.

**eFigure 5.** Forest plot of the sensitivity analysis for postmenopausal women.

**eFigure 6.** Forest plot of the sensitivity analysis for studies with pretreatment 25-hydroxyvitamin D level less than 25 ng/ml.

**eFigure 7.** Forest plot of the sensitivity analysis for chronic kidney disease.

**eFigure 8.** Forest plot of the sensitivity analysis by excluding studies that used vitamin D analogues.

**eFigure 9.** Forest plot of the sensitivity analysis by including only the studies that used daily vitamin D supplementation.

**eFigure 10.** Forest plot of the sensitivity analysis by including only the studies that used bolus vitamin D supplementation.

**eFigure 11.** Forest plot of the sensitivity analysis by including studies that used vitamin D supplementation with calcium.

**eFigure 12.** Forest plot of the sensitivity analysis by including studies that used vitamin D supplementation without calcium.

**eFigure 13.** Meta-regression analysis on major adverse cardiovascular events according to age.

**eFigure 14.** Trial sequential analysis for major adverse cardiovascular events.

This supplementary material has been provided by the authors to give readers additional information about their work.

**eTable 1: Major adverse cardiovascular event definition per each study.**

| <b>Trial/First author Name, Year of publication</b> | <b>Major adverse cardiovascular event definition</b>                                                                                                                                                                                                           |
|-----------------------------------------------------|----------------------------------------------------------------------------------------------------------------------------------------------------------------------------------------------------------------------------------------------------------------|
| <b>Trivedi et al 2003</b>                           | The composite of ischemic heart disease, stroke, or other cardiovascular disease                                                                                                                                                                               |
| <b>RECORD\Grant et al 2005</b>                      | The composite of myocardial infarction, stroke, and heart failure.                                                                                                                                                                                             |
| <b>Brazier et al 2005</b>                           | The composite of myocardial infarction, stroke, atrial fibrillation, and heart failure.                                                                                                                                                                        |
| <b>Vital D\Sanders et al 2010</b>                   | The composite of myocardial infarction, stroke, and heart failure.                                                                                                                                                                                             |
| <b>WHI\Jackson et al 2012</b>                       | The composite of coronary heart disease, revascularization, angina, and congestive heart failure                                                                                                                                                               |
| <b>OPERA\Wang et al 2014</b>                        | The composite of myocardial infarction, stroke, Syncope, bradycardia and heart failure.                                                                                                                                                                        |
| <b>EVITA\Zitterman et al 2017</b>                   | The composite of myocardial infarction, heart failure and cardiovascular hospitalization.                                                                                                                                                                      |
| <b>ViDA\Scragg et al 2017</b>                       | The composite of ischemic heart disease, pulmonary embolism, inflammatory cardiac conditions, conduction disorders, cardiac arrest, arrhythmias, ill-defined heart disease, diseases of the arteries, and diseases of the veins (including venous thrombosis). |
| <b>J-DAVID\Shoji et al 2018</b>                     | The composite of acute myocardial infarction, Congestive heart failure, Stroke, Aortic dissection/Rupture, Amputation of ischemic limb, and Cardiac sudden death.                                                                                              |
| <b>VITAL\Manson et al 2018</b>                      | The composite of myocardial infarction, stroke, or death from cardiovascular causes                                                                                                                                                                            |

Abbreviations: EVITA: Effect of vitamin D on all-cause mortality in heart failure patients; J-DAVID: Japan dialysis active vitamin D; OPERA: Oral paricalcitol in retarding cardiac hypertrophy, reducing inflammation and atherosclerosis in stage 3 - 5 chronic kidney disease; RECORD: Randomized evaluation of calcium or vitamin D; ViDA : Vitamin D assessment, VITAL: Vitamin D and omega-3 trial; WHI: Women's health initiative.

**eFigure 1: Risk of bias summary: review authors' judgments about each risk of bias item for each included study.**

|                          | Random sequence generation (selection bias) | Allocation concealment (selection bias) | Blinding of participants and personnel (performance bias) | Blinding of outcome assessment (detection bias) | Incomplete outcome data (attrition bias) | Selective reporting (reporting bias) | Other bias |
|--------------------------|---------------------------------------------|-----------------------------------------|-----------------------------------------------------------|-------------------------------------------------|------------------------------------------|--------------------------------------|------------|
| Aloia 1988               |                                             |                                         | +                                                         |                                                 | -                                        | -                                    |            |
| Baron 2015               | +                                           | +                                       | +                                                         | +                                               | +                                        | +                                    | +          |
| Berggren 2007            | -                                           | -                                       |                                                           |                                                 | -                                        | -                                    | -          |
| Brazier 2005             | +                                           | +                                       | +                                                         |                                                 | +                                        |                                      |            |
| EVITA / Zitterman 2017   | +                                           | +                                       | +                                                         | +                                               | +                                        | +                                    | +          |
| J-DAVID / Shoji 2018     | +                                           | +                                       | +                                                         | +                                               | +                                        | +                                    |            |
| Komulainen 1999          | +                                           |                                         | +                                                         | +                                               |                                          |                                      |            |
| Lehouck 2012             | +                                           | +                                       | +                                                         | +                                               | +                                        | +                                    |            |
| OPERA / Wang 2014        | +                                           | +                                       |                                                           |                                                 |                                          |                                      | -          |
| Ott 1889                 |                                             |                                         | -                                                         | -                                               | -                                        | -                                    |            |
| Prince 2008              | +                                           | +                                       | +                                                         | +                                               | +                                        | +                                    |            |
| RECORD / Grant 2005      | +                                           | +                                       | +                                                         | +                                               | +                                        | +                                    | +          |
| Schleithoff 2006         | +                                           | +                                       | +                                                         |                                                 |                                          |                                      | -          |
| STOP IT / Gallagher 2001 | +                                           | +                                       | +                                                         | +                                               |                                          |                                      | +          |
| Trivedi 2003             | +                                           |                                         | +                                                         |                                                 |                                          |                                      | -          |
| VIDA / Scragg 2017       | +                                           | +                                       | +                                                         | +                                               | +                                        | +                                    | +          |
| VITAL / Manson 2018      | +                                           | +                                       | +                                                         | +                                               | +                                        | +                                    | +          |
| Vital D / Sanders 2010   | +                                           | +                                       | +                                                         | +                                               | +                                        | +                                    |            |
| VitDISH / Witham 2013    | +                                           | +                                       | +                                                         | +                                               | +                                        | +                                    |            |
| WHI / Jackson 2006       | +                                           | +                                       | +                                                         | +                                               | +                                        | +                                    | +          |
| Zhu 2008                 | +                                           | +                                       | +                                                         | +                                               | +                                        | +                                    |            |

**eFigure 2: Funnel plot of primary endpoints (major adverse cardiovascular events).**

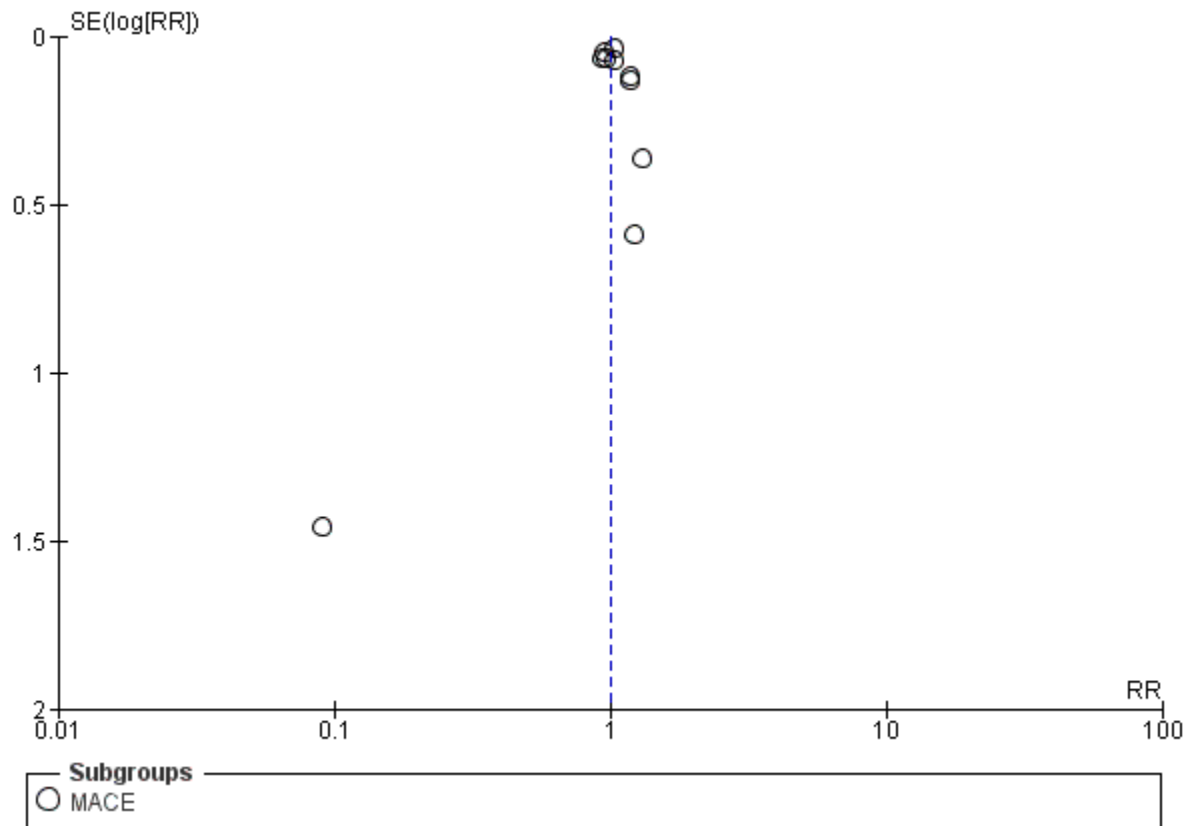

**eFigure 3: Forest plot of the sensitivity analysis for elderly patients.**

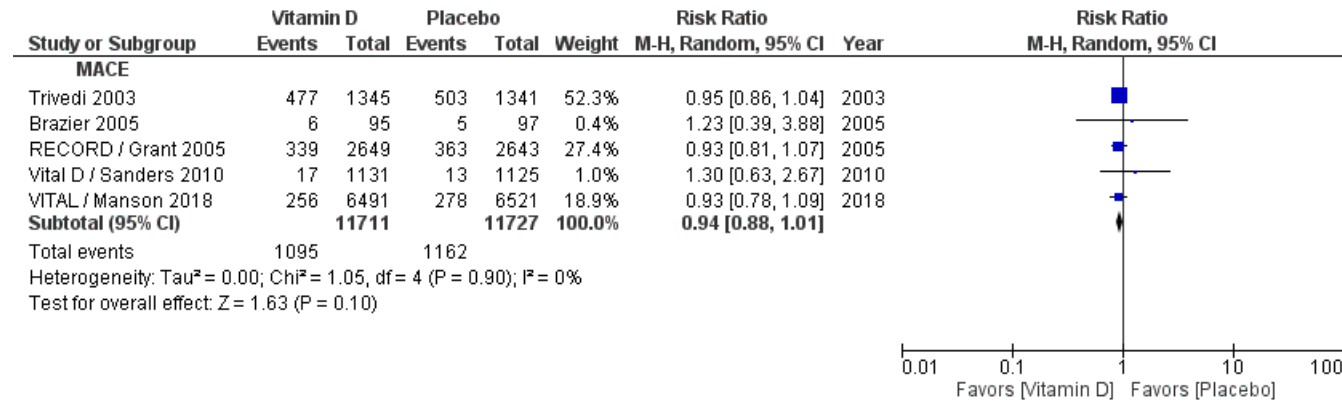

**eFigure 4: Forest plot of the sensitivity analysis for female and male patients.**

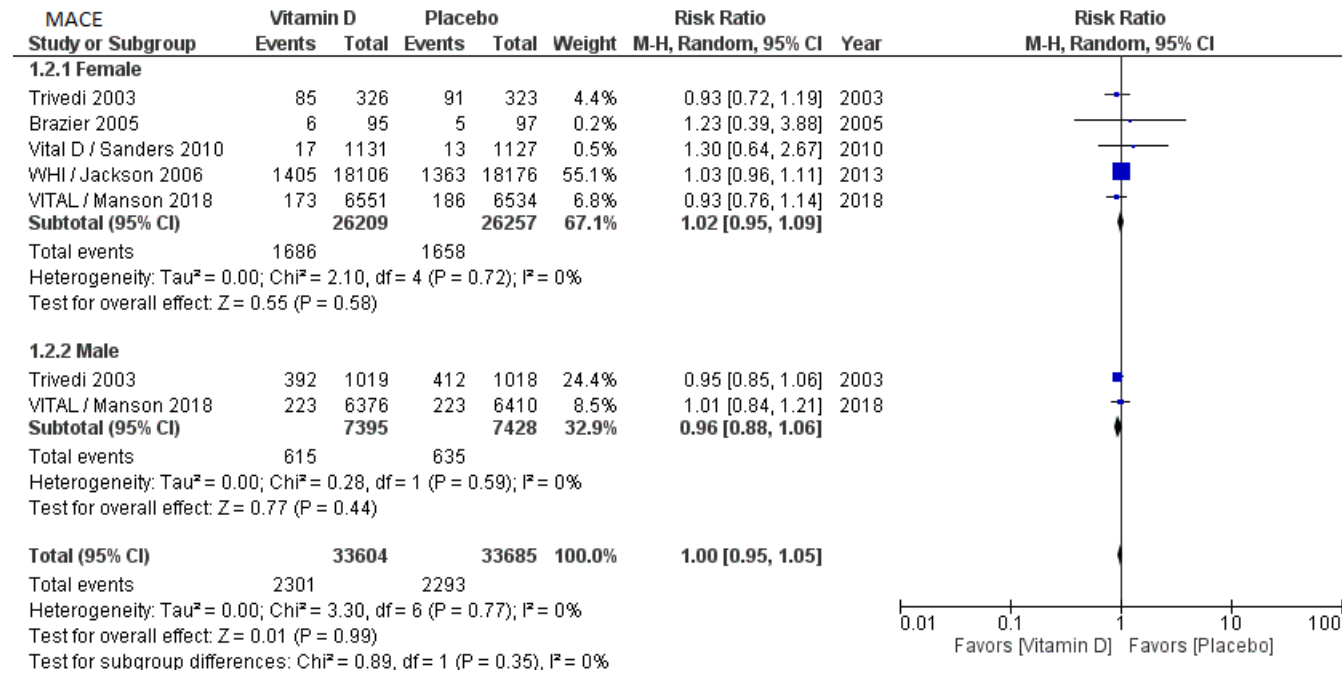

**eFigure 5: Forest plot of the sensitivity analysis for postmenopausal women.**

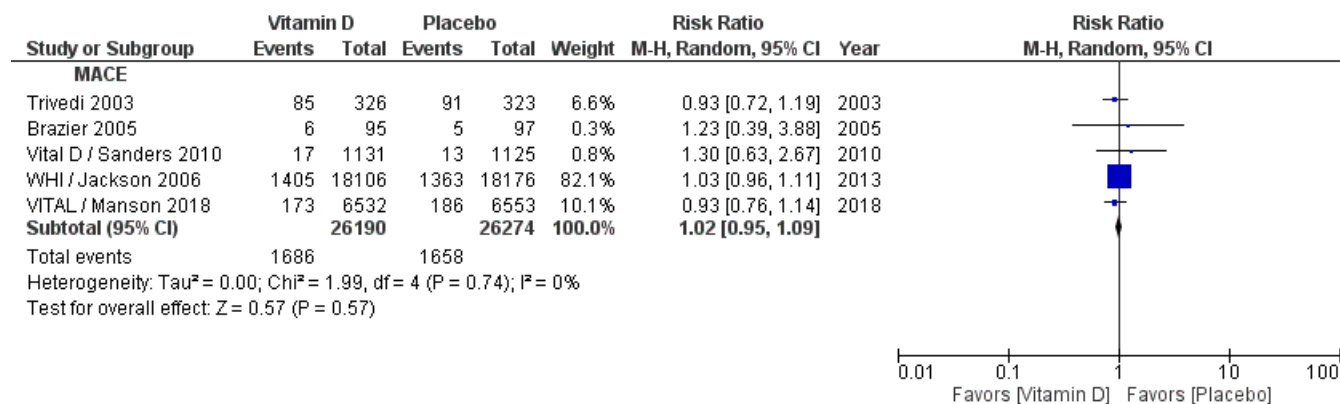

**eFigure 6: Forest plot of the sensitivity analysis for studies with pretreatment 25-hydroxyvitamin D level less than 25 ng/ml.**

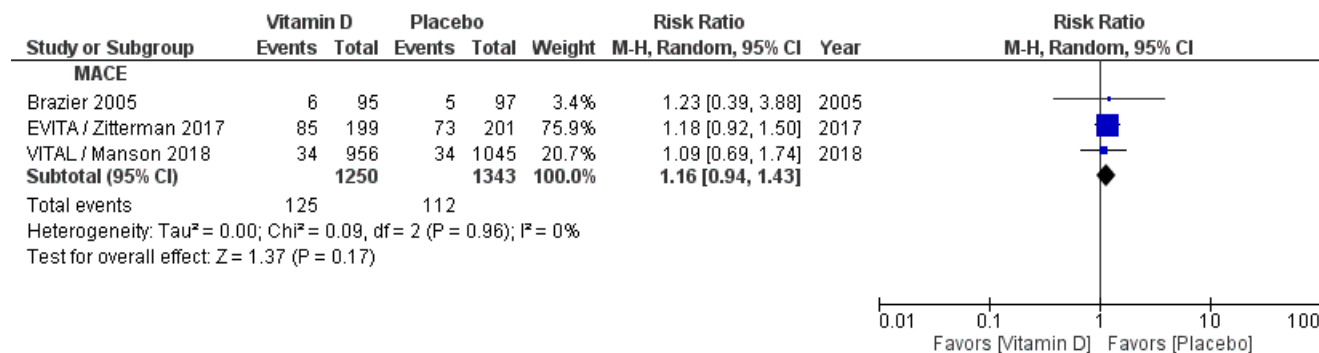

**eFigure 7: Forest plot of the sensitivity analysis for chronic kidney disease.**

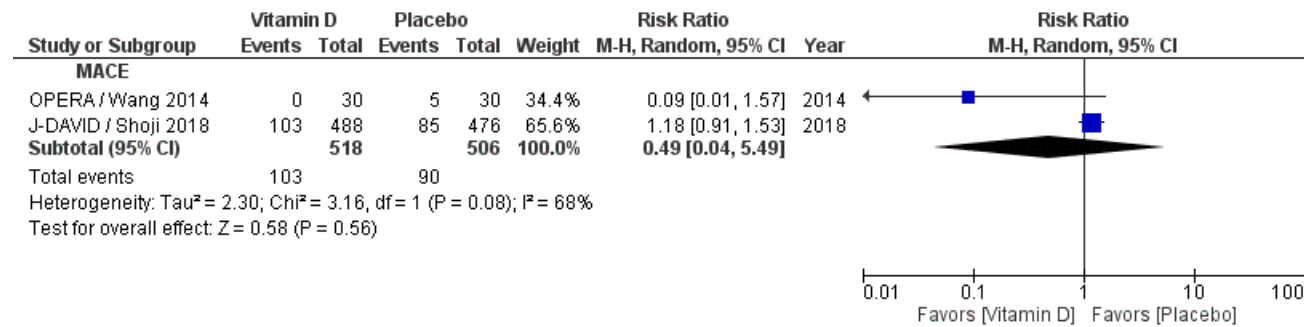

**eFigure 8: Forest plot of the sensitivity analysis by excluding studies that used vitamin D analogues.**

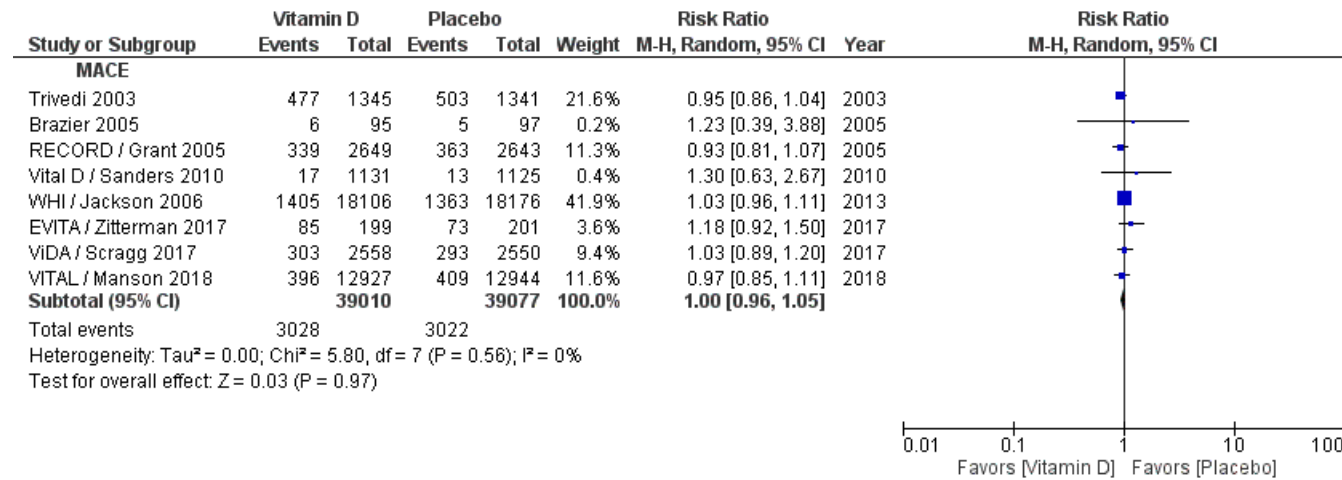



**eFigure 9: Forest plot of the sensitivity analysis by including only the studies that used daily vitamin D supplementation.**

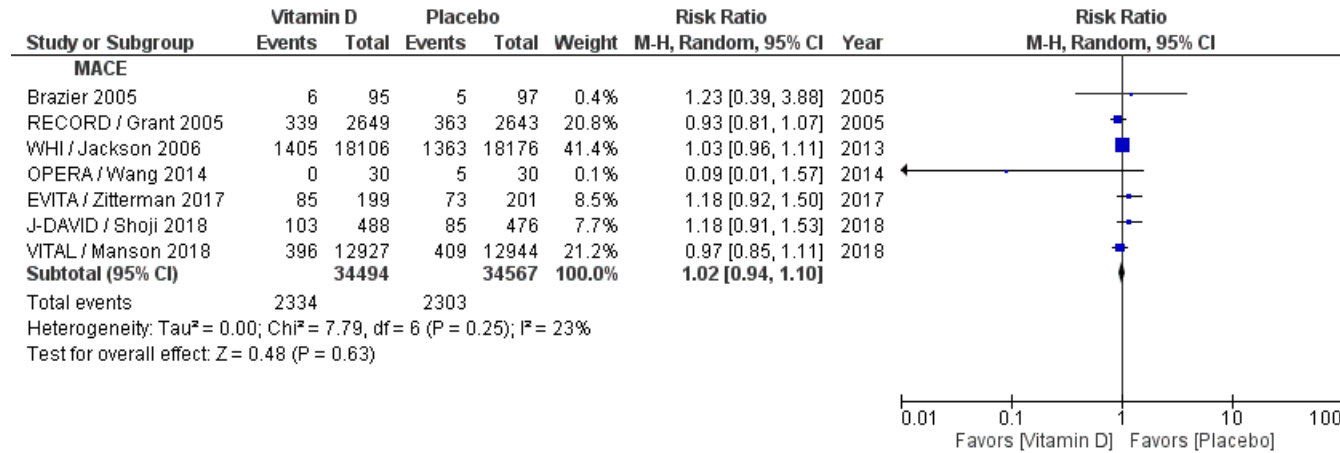

**eFigure 10: Forest plot of the sensitivity analysis by including only the studies that used bolus vitamin D supplementation.**

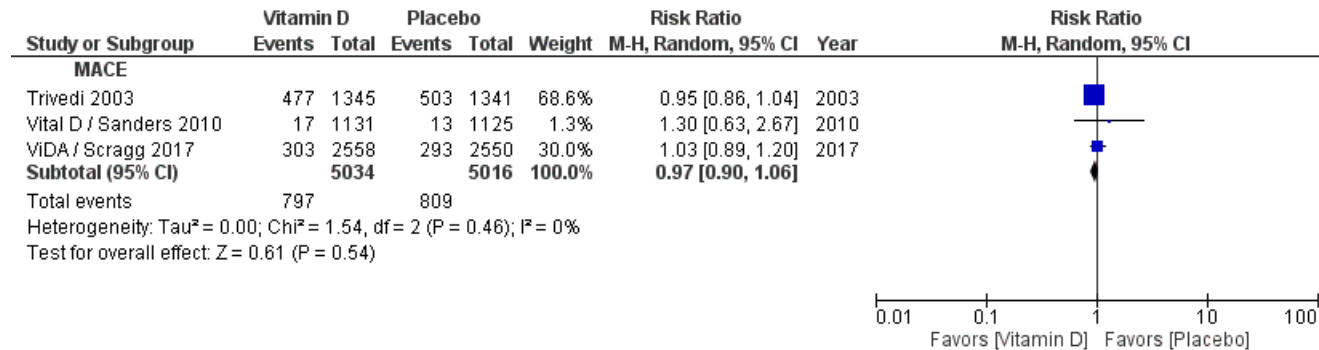

**eFigure 11: Forest plot of the sensitivity analysis by including studies that used vitamin D supplementation with calcium.**

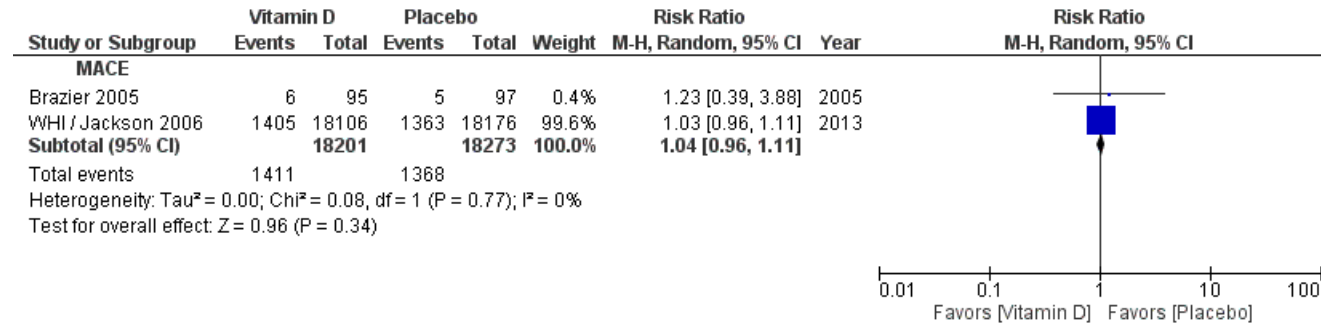

**eFigure 12: Forest plot of the sensitivity analysis by including studies that used vitamin D supplementation without calcium.**

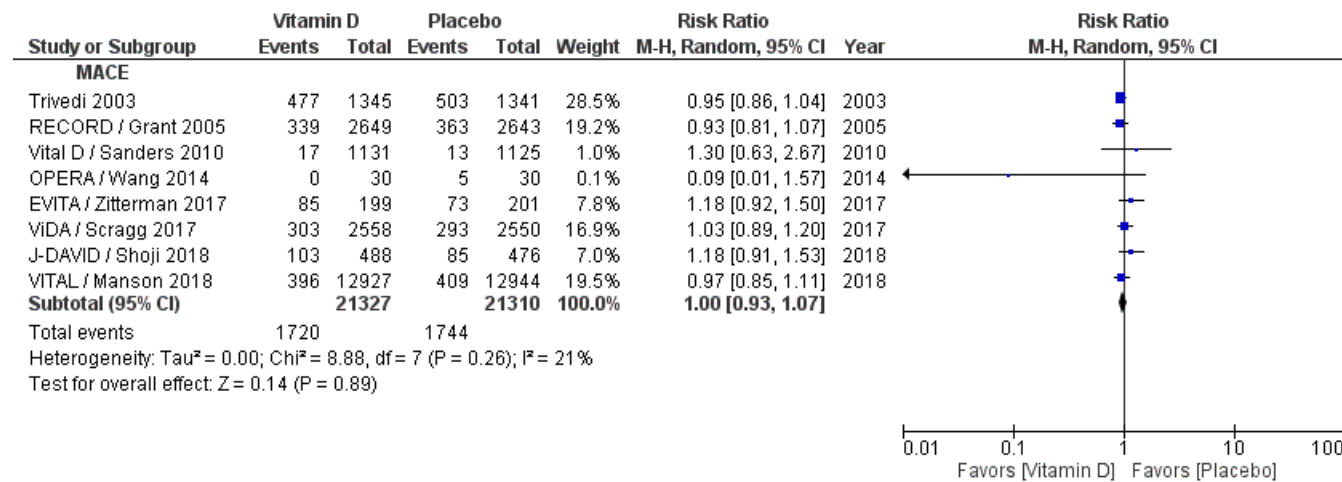

**eFigure 13: Meta-regression analysis on major adverse cardiovascular events according to age.**

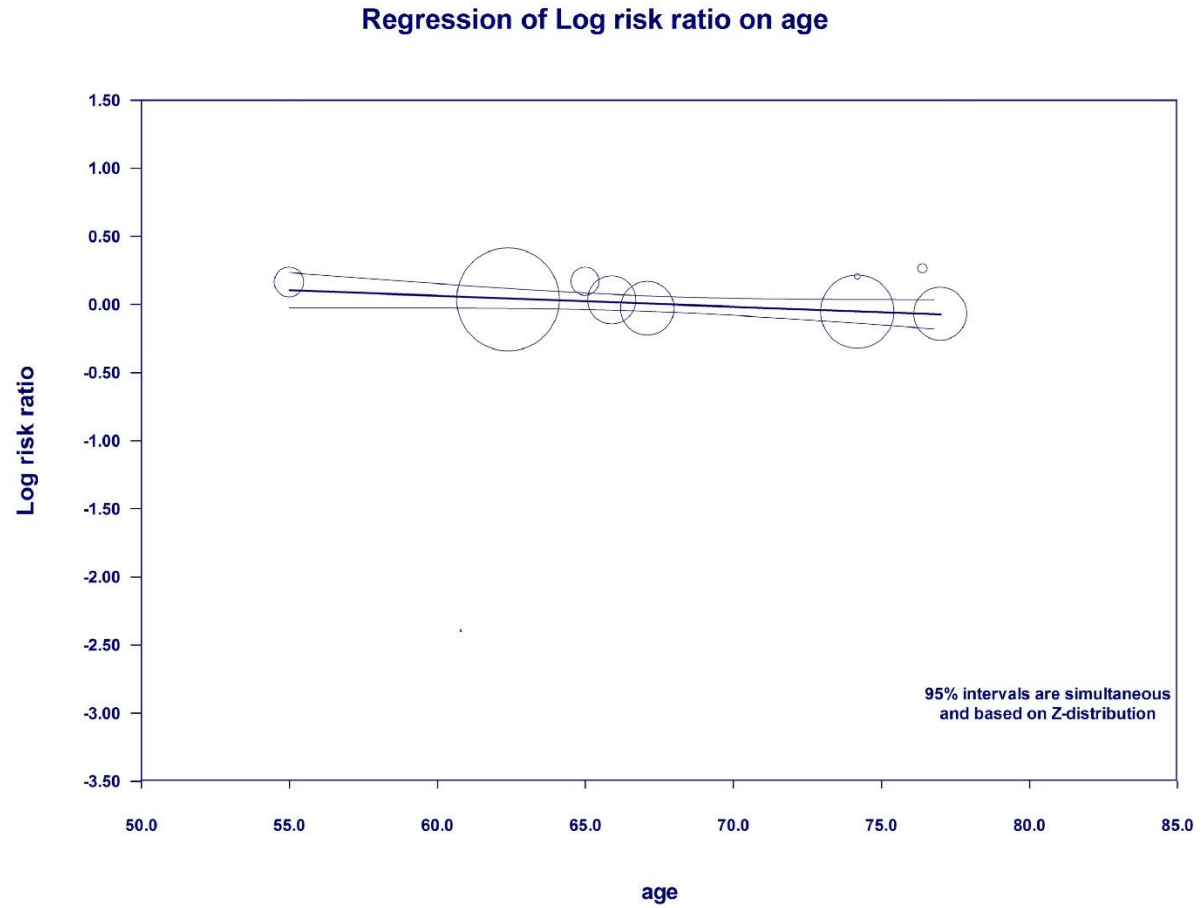

**eFigure 14: Trial sequential analysis for major adverse cardiovascular events.**

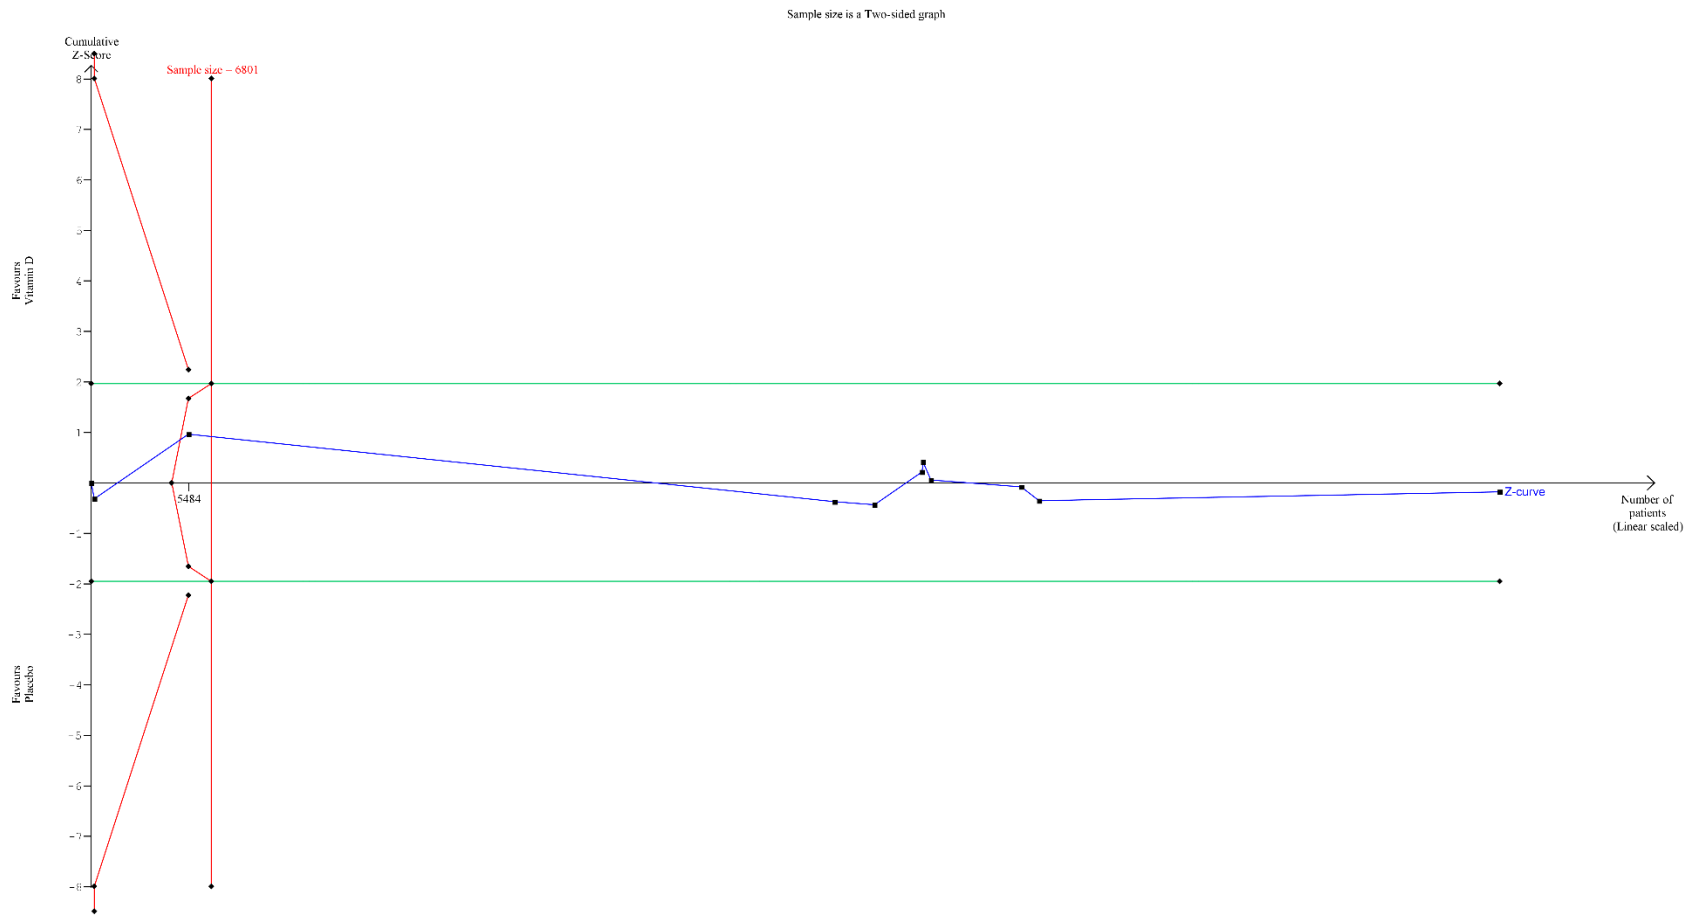

The diversity-adjusted information size = 6,801. The cumulative Z-curve (blue line with small black squares representing each trial) crosses the futility boundaries (convex red lines), indicating firm evidence for the lack of effects.
